# Supplementary material for: In vitro study of SDF-1α-loaded injectable and thermally responsive hydrogels for adipose stem cell therapy by SDF-1/CXCR4 axis
Source: Royal Society of Chemistry journal article supplement (doi:10.1039/d0tb01961e), 2020-01-01
Supplement: d0tb01961e1.pdf [file d0tb01961e1.pdf]

**In vitro study of SDF-1 $\alpha$ -loaded injectable and thermally responsive  
hydrogels for adipose stem cell therapy by SDF-1/CXCR4 axis**

Siaka Fadera <sup>1</sup>, Nai-Chen Cheng <sup>2</sup>, Tai-Horng Young <sup>3, #</sup> and I-Chi Lee <sup>1, \*</sup>

<sup>1</sup> Department of Biomedical Engineering and Environmental Sciences, National Tsing  
Hua University, Hsinchu, Taiwan

<sup>2</sup> Department of Surgery, National Taiwan University Hospital and College of  
Medicine, 7 Chung-Shan S Rd, Taipei 100, Taiwan.

<sup>3</sup> Institute of Biomedical Engineering, College of Medicine and College of  
Engineering, National Taiwan University, 1 Jen-Ai Rd, Taipei 100, Taiwan.

\* Corresponding author: I-Chi Lee

E-mail: iclee0303@gmail.com

Tel: +886-3-5715131 ext 35525

# Co-Corresponding author: Tai-Horng Young

E-mail: thyoung@ntu.edu.tw

Tel: +886-2-23123456 ext 81455

1.8% CS, 30%  $\beta$ GP, no HA

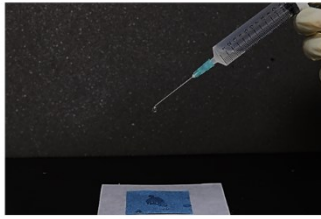

1.8% CS, 30%  $\beta$ GP, 0.9% HA

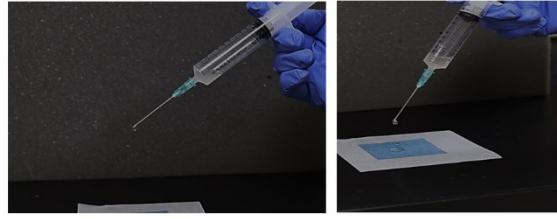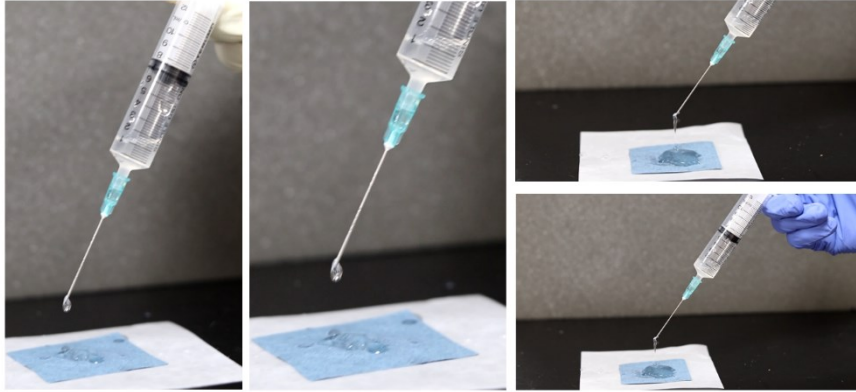

Fig. S1 Injectability of hydrogels injected through 22 gauge needle at room temperature.

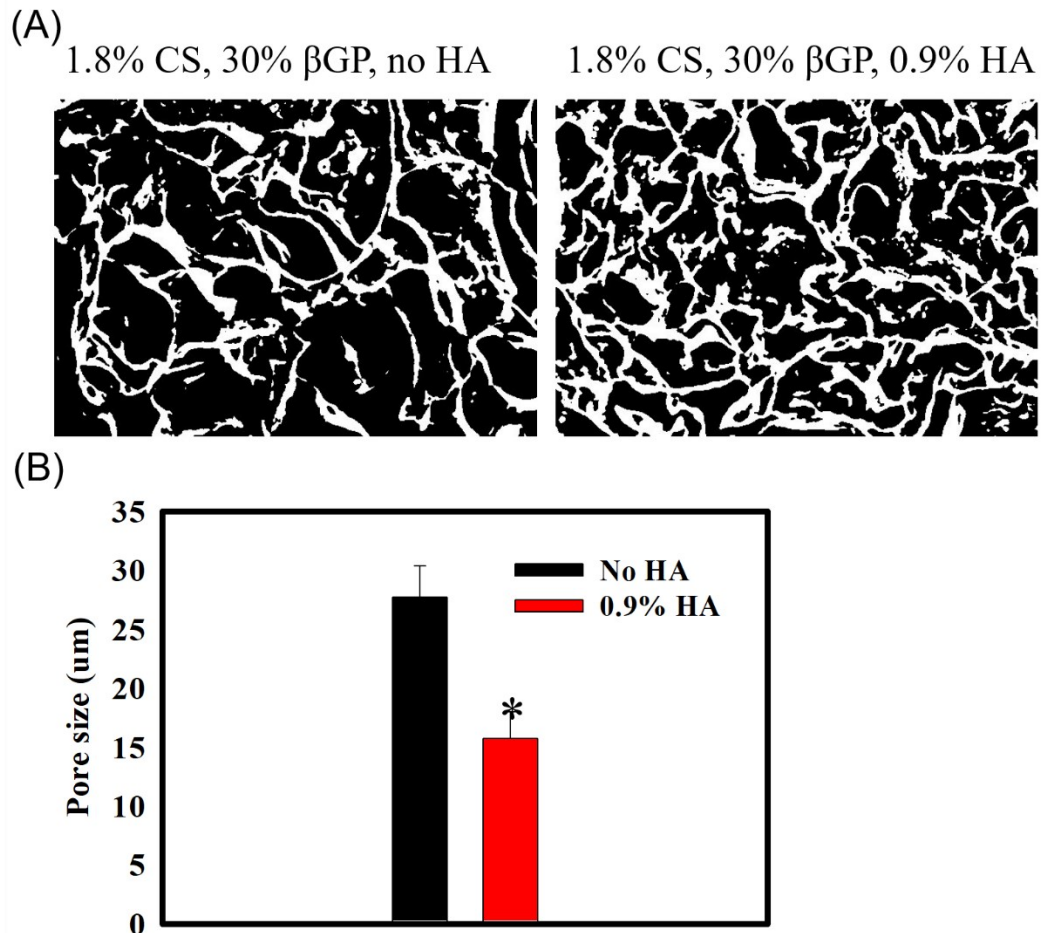

Fig. S2 (A) and (B) Porosity determination and quantification of hydrogels with/without HA by using Image J. Asterisk denotes significant difference where indicated (\* $p < 0.05$ ) as determined by a Student's t test.
